# Supplementary material for: The multi-channel reaction of the OH radical with 5-hydroxymethylcytosine: a computational study
Source: Royal Society of Chemistry journal article supplement (doi:10.1039/c5ra24293b), 2016-01-01
Supplement: c5ra24293b1.pdf [file c5ra24293b1.pdf]

## Electronic Supplementary Information for:

### **The multi-channel reaction of OH radical with 5-hydroxymethylcytosine: a computational study**

Lingxia Jin<sup>\*,a</sup> Caibin Zhao<sup>a</sup> Cunfang Liu<sup>a</sup> Suotian Min<sup>a</sup> Tianlei Zhang<sup>a</sup> Zhiyin Wang<sup>a</sup>

Wenliang Wang<sup>\*,b</sup> Qiang Zhang<sup>a</sup>

*<sup>a</sup>Shaanxi Province Key Laboratory of Catalytic Fundamentals & Applications, Shaanxi Key Laboratory for Resource Biology, Vitamin D Research Institute, School of Chemical & Environment Science, Shaanxi University of Technology, Hanzhong 723001*

*<sup>b</sup>Key Laboratory for Macromolecular Science of Shaanxi Province, School of Chemistry and Chemical Engineering, Shaanxi Normal University, Xi'an 710062*

---

\*Corresponding authors. Tel: +86-916-2641660; e-mail: [jinlingxia1982@126.com](mailto:jinlingxia1982@126.com) (L.X. Jin); Tel: +86-29-81530815 Fax: +86-29-81530727; e-mail: [wlwang@snnu.edu.cn](mailto:wlwang@snnu.edu.cn) (W. L. Wang).

## Captions:

**Table S1** The relevant information of different 5-hmCyt tautomers and their isomerization reactions both in the gas and aqueous Phases

**Table S2** The energy information for the addition of •OH to C2, N3 and C4 sites of 5-hmCyt both in the gas and aqueous phases

Fig.S1 The energy profiles along the dihedral angle O3C7C5C4 (degree) in 5-hmCyt.

Fig.S2 Optimized corresponding structures along the energy profiles for 5-hmCyt.

Fig.S3 The minimum energy path of path R5.

Fig.S4 The minimum energy path of path R6.

Fig. S5 Optimized structures (bond distances in Å) in the aqueous phase for the addition reaction of •OH mediated 5-hmCyt (paths R1 and R2) at the CBS-QB3 composite approach.

Fig. S6 Optimized structures (bond distances in Å) in the aqueous phase for the hydrogen-abstraction reaction (the H3 and H4 of NH<sub>2</sub> group, the H7 of cyclic C6 atom) of •OH mediated 5-hmCyt (paths R3, R4, R7) at the CBS-QB3 composite approach.

Fig. S7 Optimized structures (bond distances in Å) in the aqueous phase for the hydrogen-abstraction reaction (the H5 and H6 of C7 atom, H8 of O3 atom) of •OH mediated 5-hmCyt (paths R5, R6, R8) at the CBS-QB3 composite approach.

## Table content:

**Table S1** The relevant information of different 5-hmCyt tautomers and their isomerization reactions both in the gas and aqueous Phases

| Species | $\Delta G^g/(kJ\cdot mol^{-1})$ | $\Delta G^{g\ddagger}/(kJ\cdot mol^{-1})$ | $\Delta G^s/(kJ\cdot mol^{-1})$ | $\Delta G^{s\ddagger}/(kJ\cdot mol^{-1})$ |
|---------|---------------------------------|-------------------------------------------|---------------------------------|-------------------------------------------|
| M1      | 6.00                            |                                           | 1.67                            |                                           |
| M2      | 0.00                            |                                           | 0.00                            | 0.00                                      |
| M3      | 0.00                            |                                           | 0.00                            | 0.00                                      |
| TSM1/M2 | 18.78                           |                                           | 13.04                           |                                           |
| TSM2/M3 | 18.82                           |                                           | 17.39                           |                                           |
| TSM3/M1 | 18.82                           |                                           | 13.04                           |                                           |
| M1→M2   |                                 | 12.78                                     |                                 | 11.37                                     |
| M2→M3   |                                 | 18.82                                     |                                 | 17.39                                     |
| M3→M1   |                                 | 18.82                                     |                                 | 13.04                                     |

$\Delta G^g$  and  $\Delta G^{g\ddagger}$  are relative free energy and activation free energy in the gas phase, respectively;  $\Delta G^s$  and  $\Delta G^{s\ddagger}$  are relative free energy and activation free energy with PCM model based on the optimized geometries in the aqueous phase.

**Table S2** The energy information <sup>a</sup> (kJ·mol<sup>-1</sup>) for the addition of •OH to C2, N3 and C4 sites of 5-hmCyt both in the gas and aqueous phases

| Species            | CBS-QB3 <sup>b</sup> |              |                        | PCM <sup>c</sup> |                        |
|--------------------|----------------------|--------------|------------------------|------------------|------------------------|
|                    | $\Delta E^g$         | $\Delta G^g$ | $\Delta G^{g\ddagger}$ | $\Delta G^s$     | $\Delta G^{s\ddagger}$ |
| Addition Reactions |                      |              |                        |                  |                        |
| R <sup>d</sup>     | 0.00                 | 0.00         |                        | 0.00             |                        |
| C2-IM              | -24.08               | 9.79         |                        | 28.79            |                        |
| C2-TS              | 34.41                | 75.37        |                        | 99.19            |                        |
| C2-P               | 7.43                 | 46.45        |                        | 70.58            |                        |
| N3-IM              | -25.72               | 6.27         |                        | 23.57            |                        |
| N3-TS              | 34.26                | 73.07        |                        | 101.18           |                        |
| N3-P               | 21.64                | 57.52        |                        | 97.54            |                        |
| C4-IM              | -25.45               | 8.85         |                        | 23.56            |                        |
| C4-TS              | 18.03                | 55.95        |                        | 75.56            |                        |
| C4-P               | -23.60               | 13.16        |                        | 41.51            |                        |
| C2-IM→C2-P         |                      |              | 65.58                  |                  | 70.40                  |
| N3-IM→N3-P         |                      |              | 66.80                  |                  | 77.61                  |
| C4-IM→C4-P         |                      |              | 47.10                  |                  | 52.00                  |

<sup>a</sup>  $\Delta E^g$ ,  $\Delta G^g$ , and  $\Delta G^{g\ddagger}$  are relative energy, relative free energy, and activation free energy in the gas phase, respectively;  $\Delta G^s$  and  $\Delta G^{s\ddagger}$  are relative free energy and activation free energy with PCM model based on the optimized geometries in the aqueous phase. <sup>b</sup> CBS-QB3 composite approach. <sup>c</sup> CBS-QB3 with PCM model. <sup>d</sup> denotes 5-hmCyt+•OH.

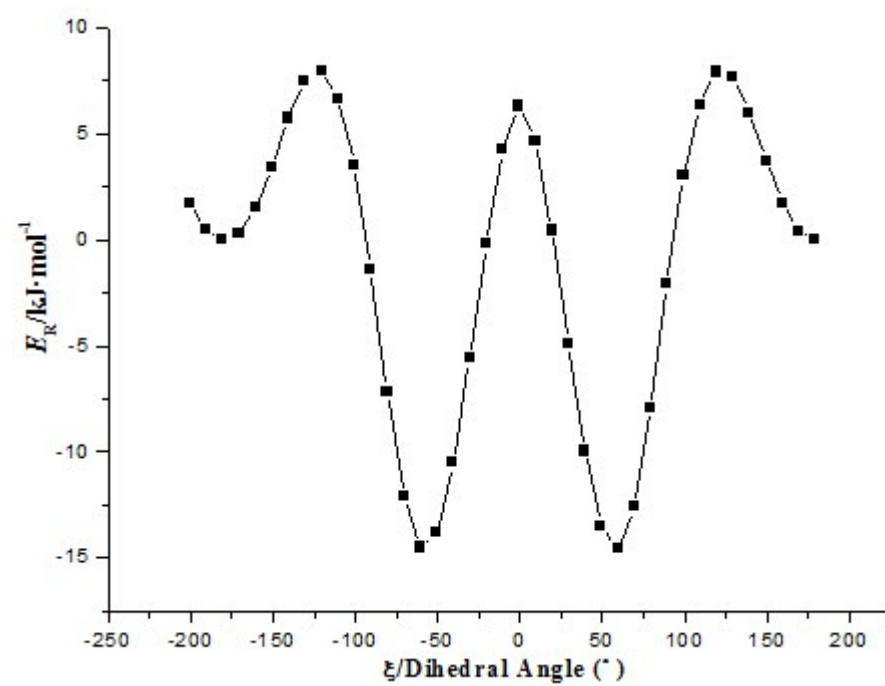

Fig. S1

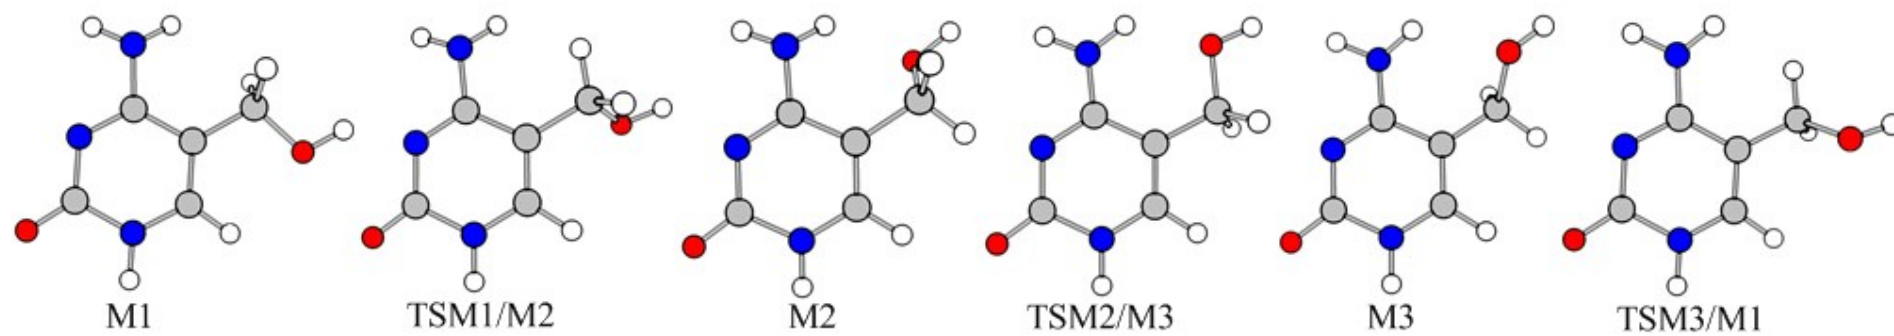

Fig. S2

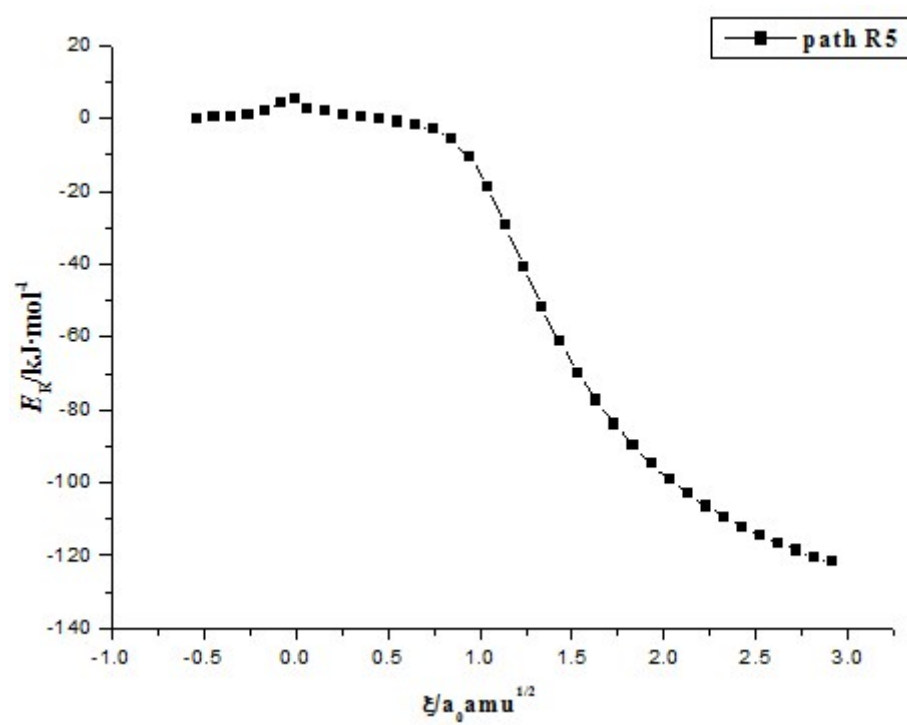

Fig. S3

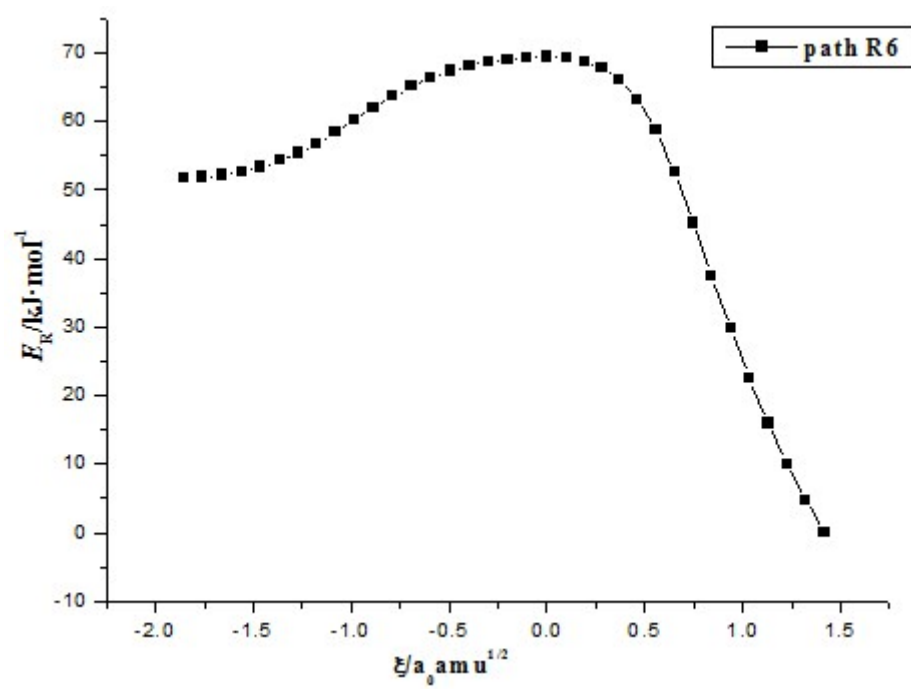

Fig. S4

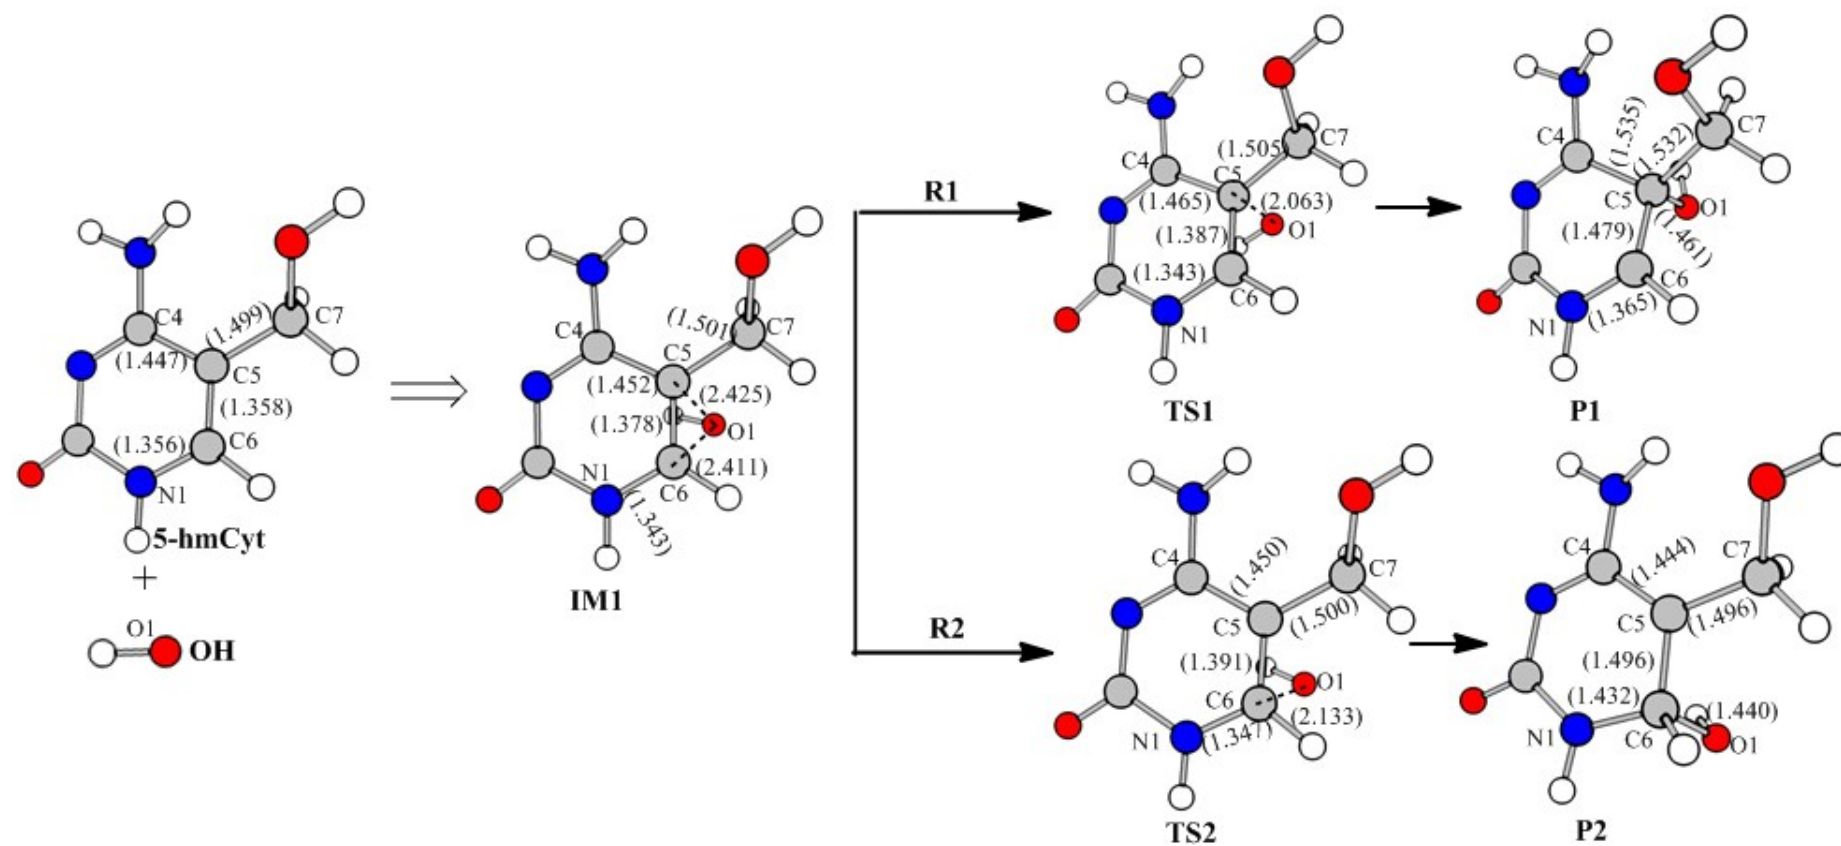

Fig. S5

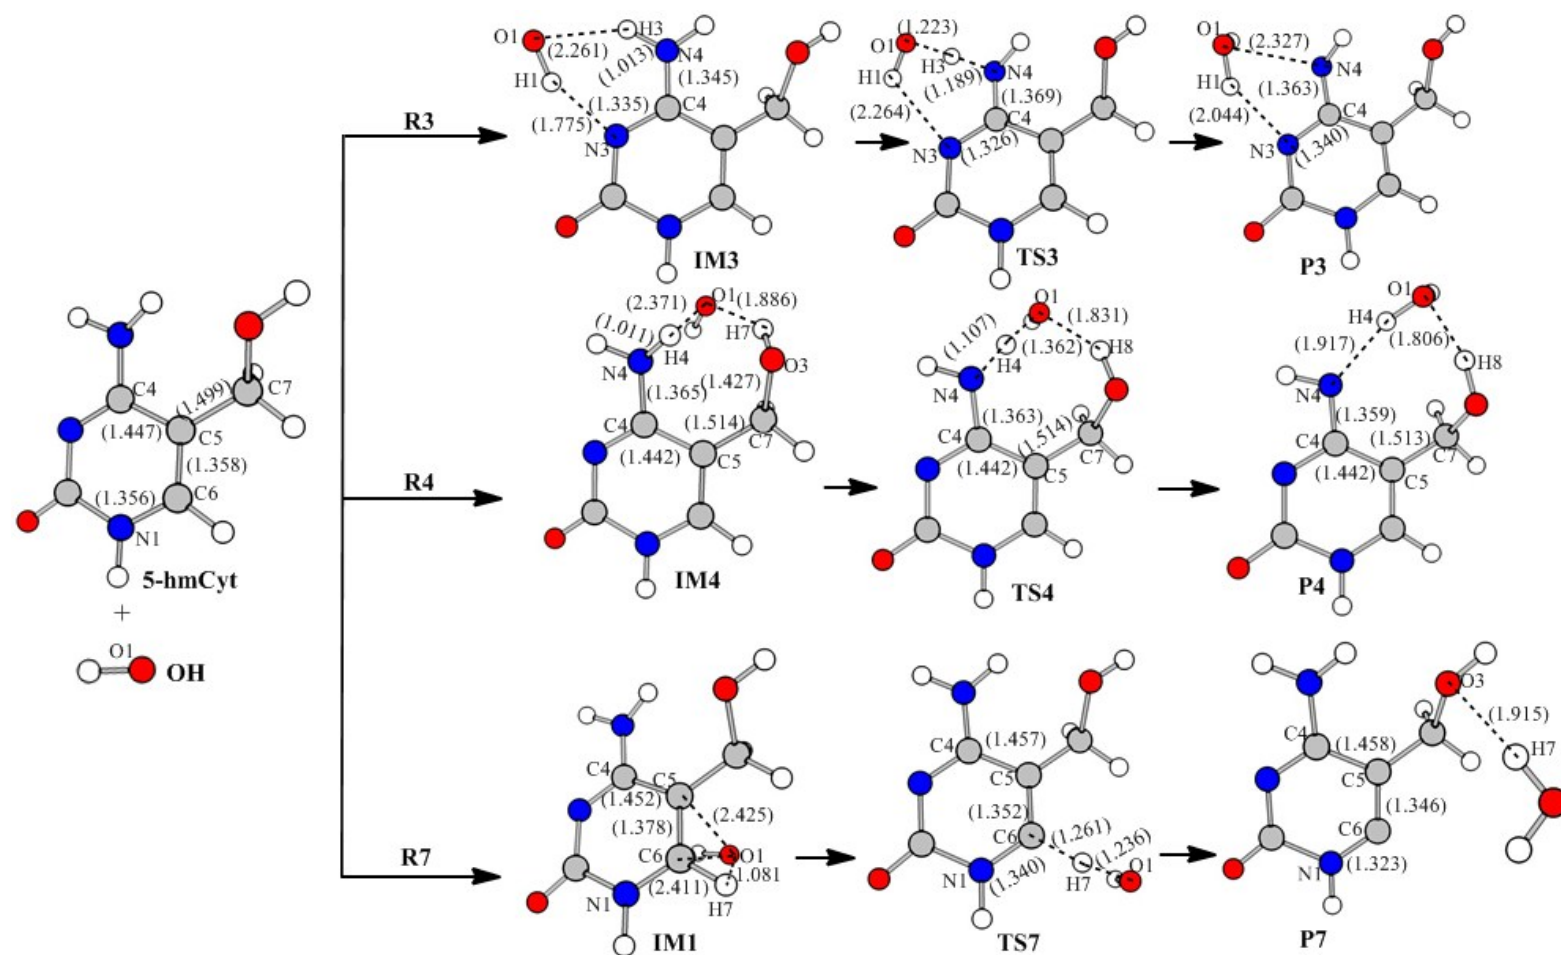

Fig. S6

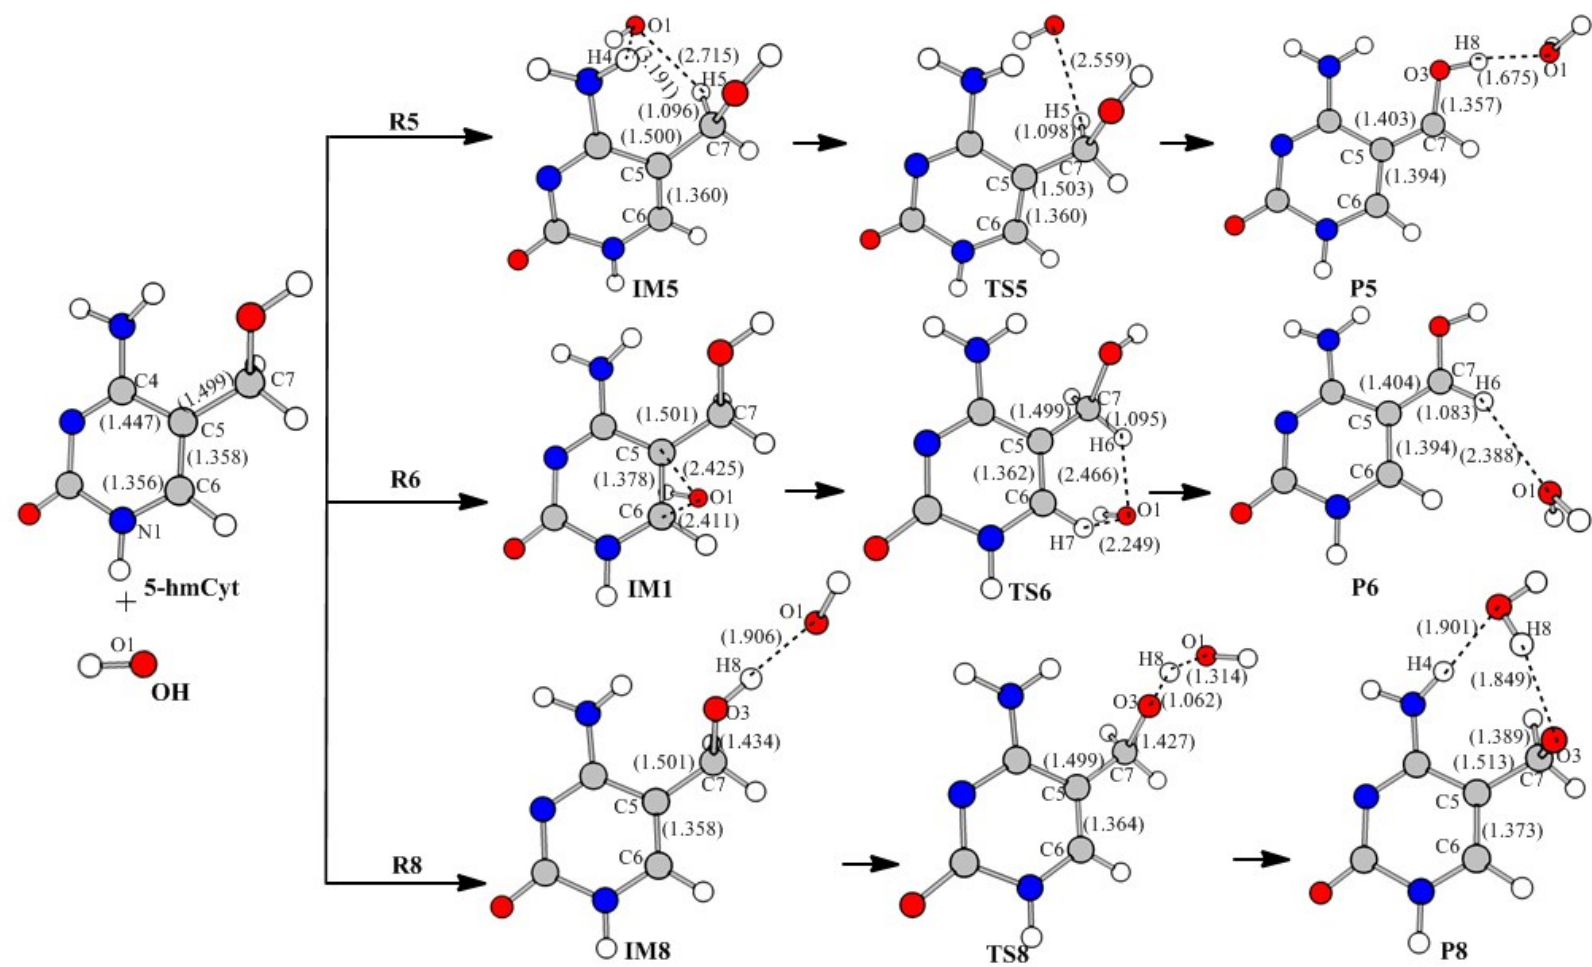

Fig. S7
